# Supplementary material
Source: MDPI journal article supplement (https://www.mdpi.com/2673-7086/1/3/13)
Supplement: s1 [file s1]

Projection is Irish Transverse Mercator

Legend:

1 = Green (non-woody)

2 = Green (woody)

3 = Grey (built)

4 = Blue (water)

5 = Brown (mudflats)
