# Supplementary material
Source: MDPI journal article supplement (https://www.mdpi.com/2673-7086/1/3/13)
Supplement: s1 [file s1]

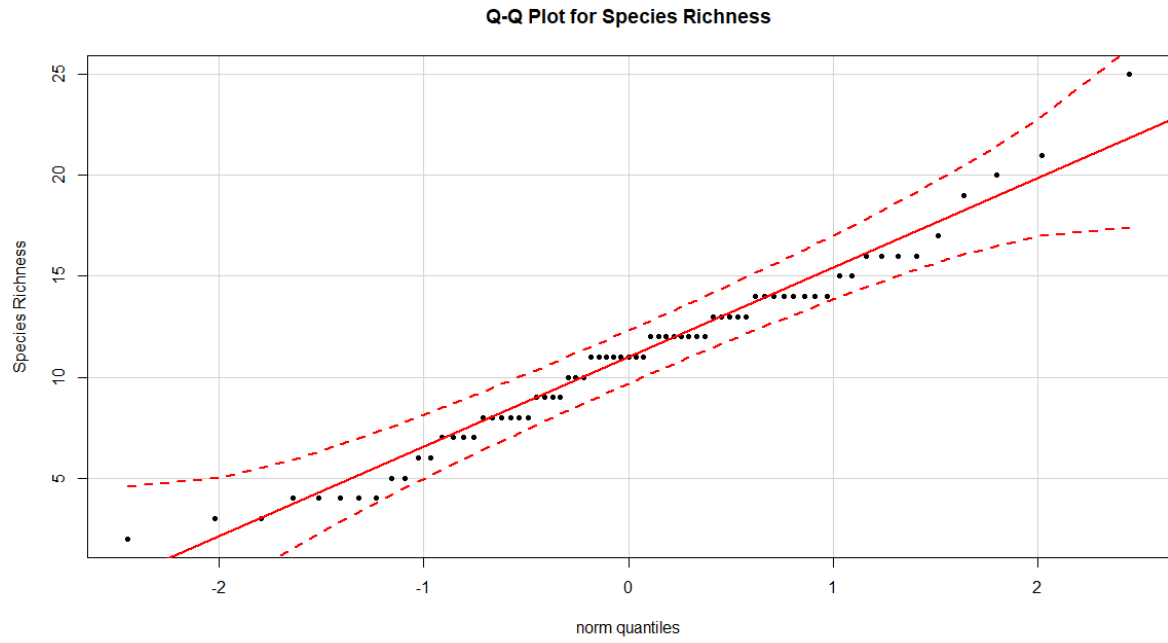

*Fig.SI6.1: The species richness QQ plot, showing a Gaussian distribution.*

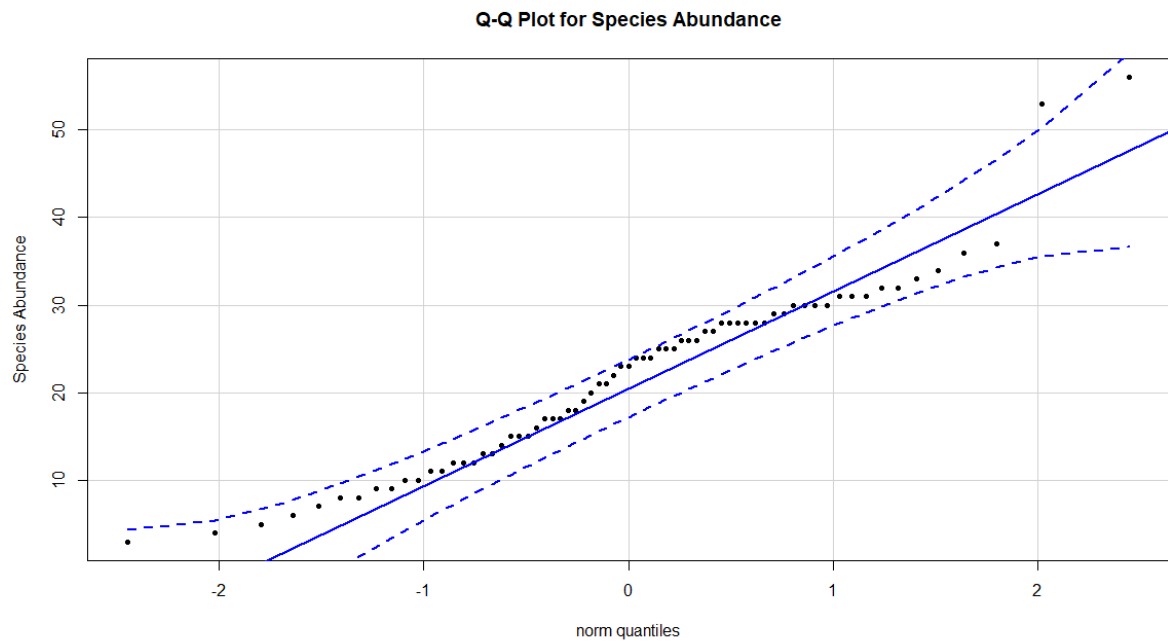

*Fig.SI6.2: The species abundance QQ plot, showing a relatively Gaussian distribution.*
