# Supplementary material
Source: MDPI journal article supplement (https://www.mdpi.com/2673-7086/1/3/13)
Supplement: s1 [file s1]

**Table S17.1.** Coefficient and Standard Errors for Richness and Abundance when parameterized using the class metrics for the aggregated data across zones. \*  $p < 0.01$ , \*\*  $p < 0.001$ . No corrections for multiple tests were included. Model reported is a result of forwards and backwards AIC selection.

| Variable        | 50m      |           |           |           | 100m     |           |           |           | 200m     |           |           |           |
|-----------------|----------|-----------|-----------|-----------|----------|-----------|-----------|-----------|----------|-----------|-----------|-----------|
|                 | Richness |           | Abundance |           | Richness |           | Abundance |           | Richness |           | Abundance |           |
|                 | Estimate | Std.error | Estimate  | Std.error | Estimate | Std.error | Estimate  | Std.error | Estimate | Std.error | Estimate  | Std.error |
| Intercept       | 14.25**  | 0.56      | 49.82**   | 13.10     | 13.55**  | 2.52      | 13.57**   | 2.00      | 16.21**  | 0.96      | 11.68**   | 2.17      |
| Woody           |          |           | -0.56     | 0.29      |          |           | 0.16      | 0.08      |          |           | 0.33*     | 0.11      |
| Water           |          |           |           |           |          |           | -0.34     | 0.29      |          |           |           |           |
| Non-Woody       |          |           | -0.24     | 0.14      | 0.00     | 0.04      | 0.15**    | 0.04      |          |           | 0.18*     | 0.51      |
| Built           | -0.08**  | 0.01      | -0.36*    | 0.13      | -0.09*   | 0.03      |           |           | -0.11**  | 0.02      |           |           |
| Woody:Non-Woody |          |           | 0.01      | 0.00      |          |           |           |           |          |           |           |           |
| Woody:Water     |          |           |           |           |          |           | 0.04      | 0.02      |          |           |           |           |
| Water:Built     |          |           |           |           |          |           |           |           |          |           |           |           |
| Non-Woody:Built |          |           |           |           | 0.00     | 0.00      |           |           |          |           |           |           |

**Table S17.2.** Coefficient and Standard Errors for Richness and Abundance when parameterized using the landscape metrics for the aggregated data across zones. \*  $p < 0.01$ , \*\*  $p < 0.001$ . No corrections for multiple tests were included. Model reported is a result of forwards and backwards AIC selection.

[illegible]
